# Supplementary material
Source: PubMed Central journal article supplement (PMC4197063)
Supplement: NIHMS613494-supplement-03.pdf [file NIHMS613494-supplement-03.pdf]

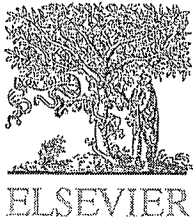

*Neurotoxicology and Teratology*  
Conflict of Interest Policy

Article Number: N/A

Article Title: Intrauterine Cocaine Exposure and Auditory Processes in Preadolescence

Author 6: Deborah A. Frank, MD

**Declarations**

*Neurotoxicology and Teratology* requires that all authors sign a declaration of conflicting interests. If you have nothing to declare in any of these categories then this should be stated.

**Conflict of Interest**

A conflicting interest exists when professional judgement concerning a primary interest (such as patient's welfare or the validity of research) may be influenced by a secondary interest (such as financial gain or personal rivalry). It may arise for the authors when they have financial interest that may influence their interpretation of their results or those of others. Examples of potential conflicts of interest include employment, consultancies, stock ownership, honoraria, paid expert testimony, patent applications/registrations, and grants or other funding.

Please state any competing interests

None.

**Funding Source**

All sources of funding should also be acknowledged and you should declare any involvement of study sponsors in the study design; collection, analysis and interpretation of data; the writing of the manuscript; the decision to submit the manuscript for publication. If the study sponsors had no such involvement, this should be stated.

Please state any sources of funding for your research

This research was supported, in part, by a grant from the National Institute of Drug Abuse (RO1 DA06532, Deborah A Frank, PI) and a grant from NIH/NCRR (MO1RR00533).

**Signature** (a scanned signature is acceptable, but each author must sign)

**Print name**

Deborah A. Frank, MD
